# Supplementary material for: Race/Ethnic Disparities in Mild Cognitive Impairment and Dementia: The Northern Manhattan Study
Source: PubMed Central journal article supplement — J Alzheimers Dis. 2021 Apr 6;80(3):1129–38. doi: 10.3233/JAD-201370 (PMC8150441; doi:10.3233/jad-201370), 2021-04-06
Supplement: jad-80-jad201370-s001.pdf [file jad-80-jad201370-s001.pdf]

# Supplementary Material

## Race/Ethnic Disparities in Mild Cognitive Impairment and Dementia: The Northern Manhattan Study

**Supplementary Table 1. Comparison of participants who did or did not return for visit 2**

| Variable                                        | Returned for Visit 2 |              |                     |                 |                 | p <sup>s</sup> | p <sup>‡</sup> |
|-------------------------------------------------|----------------------|--------------|---------------------|-----------------|-----------------|----------------|----------------|
|                                                 | Yes<br>(n=989)       | Total        | Hispanic<br>(n=175) | Black<br>(n=61) | White<br>(n=57) |                |                |
| Global cognitive domain Z-score at visit 1 (SD) | 0.1 (0.7)            | -0.3 (0.8)   | -0.39 (0.72)        | -0.35 (0.87)    | 0.07 (0.67)     | <0.0001        | <0.0001        |
| Age, visit 1                                    | 69 (9)               | 75 (9)       | 73 (9)              | 76 (10)         | 78 (9)          | 0.0003         | <0.0001        |
| Education, y                                    | 10 (5)               | 10 (5)       | 8 (5)               | 12 (4)          | 13 (4)          | <0.0001        | 0.905          |
| Race/ethnicity*                                 |                      |              |                     |                 |                 | N/A            |                |
| White                                           | 134 (14)             | 57 (19)      | N/A                 | N/A             | N/A             |                | 0.007          |
| Black                                           | 162 (16)             | 61 (20)      | N/A                 | N/A             | N/A             |                |                |
| Hispanic                                        | 672 (68)             | 175 (58)     | N/A                 | N/A             | N/A             |                |                |
| Women                                           | 610 (62)             | 170 (57)     | 102 (58)            | 32 (53)         | 31(54)          | 0.53           | 0.106          |
| Medical insurance status                        |                      |              |                     |                 |                 |                |                |
| Medicare or private insurance                   | 505 (51)             | 172 (57)     | 66 (38)             | 46 (75)         | 54 (95)         | <0.0001        | 0.064          |
| Medicaid or no insurance                        | 484 (49)             | 129 (43)     | 109 (62)            | 15 (25)         | 3 (5)           |                |                |
| Literacy Z-scores                               |                      |              |                     |                 |                 |                |                |
| WRAT/WAT                                        | 0.01 (0.9)           | -0.05 (1.04) | -0.003 (0.952)      | -0.358 (1.202)  | 0.268 (0.830)   | 0.003          | 0.387          |
| Peabody                                         | 0.05 (1.0)           | -0.16 (1.0)  | -0.116 (1.002)      | -0.579 (1.150)  | 0.179 (0.723)   | 0.0002         | 0.003          |
| Current smoker                                  | 155 (16)             | 48 (16)      | 25 (14)             | 16 (26)         | 6 (11)          | 0.034          | 0.909          |
| Moderate or Heavy Physical Activity             | 97 (10)              | 34 (11)      | 17 (9)              | 8 (13)          | 7 (12)          | 0.417          | 0.464          |
| Diabetes mellitus                               | 267 (27)             | 86 (29)      | 63 (36)             | 12 (20)         | 7 (12)          | 0.0008         | 0.592          |
| Anti-hypertensive use                           | 590 (60)             | 193 (64)     | 114 (65)            | 38 (62)         | 36 (63)         | 0.667          | 0.165          |
| Systolic BP, mm Hg                              | 136 (17)             | 139 (18)     | 139 (18)            | 141 (15)        | 134 (15)        | 0.057          | 0.004          |
| Diastolic BP, mm Hg                             | 79 (9)               | 76 (10)      | 77 (11)             | 78 (10)         | 72 (10)         | 0.015          | 0.0005         |
| HDL, mg/dL                                      | 53 (17)              | 54.9 (17)    | 50 (14)             | 65 (21)         | 58 (17)         | <0.0001        | 0.079          |
| LDL, mg/dL                                      | 116 (36)             | 114.2 (34)   | 117 (34)            | 109 (33)        | 111 (34)        | 0.371          | 0.442          |

|                               |               |               |               |               |               |       |         |
|-------------------------------|---------------|---------------|---------------|---------------|---------------|-------|---------|
| Waist Hip Ratio               | 0.915 (0.084) | 0.924 (0.080) | 0.928 (0.075) | 0.921 (0.073) | 0.918 (0.105) | 0.808 | 0.117   |
| Percent WMHV**                | 0.594 (0.737) | 0.955 (1.066) | 0.923 (1.008) | 1.320 (1.373) | 0.662 (0.716) | 0.002 | <0.0001 |
| Brain parenchymal fraction*** | 0.730 (0.040) | 0.706 (0.046) | 0.713 (0.039) | 0.702 (0.056) | 0.689 (0.047) | 0.196 | <0.0001 |

\$ p-value for age adjusted global comparison among three race/ethnic groups (2 degrees of freedom)

¥ p-value for comparison between those who returned for visit2 and those who did not

\* Column percentages sum to 98 because data for Other races are not included.

WAT, Word Accentuation Test; Peabody, Peabody Picture Vocabulary Test; BP, blood pressure; HDL, high density lipoprotein; LDL, low density lipoprotein; WRAT, Wide Range Achievement Test.

\*\* Percent Total Cranial Volume adjusted WMHV

\*\*\* Total Cranial Volume adjusted (proportion)

**Supplementary Table 2. Multivariable model of race/ethnicity and ordinal outcome of MCI/dementia among participants that were cognitively healthy at visit 1**

| Parameter             | OR  | 95% CI of OR | p*   | p**     |         |
|-----------------------|-----|--------------|------|---------|---------|
| Model 1               |     |              |      |         |         |
| Black versus White    | 1.8 | 0.8          | 4    | 0.175   | <0.0001 |
| Hispanic versus White | 6   | 2.7          | 13.6 | <0.0001 |         |
| Hispanic versus Black | 3.4 | 1.7          | 7.1  | 0.0008  |         |
| Model 2               |     |              |      |         |         |
| Black versus White    | 1.8 | 0.7          | 4.1  | 0.364   | <0.0001 |
| Hispanic versus White | 6.9 | 2.9          | 16.8 | 0.0001  |         |
| Hispanic versus Black | 3.9 | 1.7          | 9.0  | 0.0011  |         |
| Model 3               |     |              |      |         |         |
| Black versus White    | 1.7 | 0.7          | 3.8  | 0.215   | <0.0001 |
| Hispanic versus White | 5.9 | 2.6          | 13.4 | <0.0001 |         |
| Hispanic versus Black | 3.5 | 1.7          | 7.2  | 0.0009  |         |

Cognitively healthy defined as MMSE score of 27 or greater.

\* p-value for testing pairwise comparison based on ordinal regression

\*\* p-value for Likelihood Ratio Test with 2 degrees of freedom

Model 1 adjusted for age, education, medical insurance status, literacy.

Model 2 adjusted for variables in model 1 and smoking, leisure time physical activity, diabetes mellitus, systolic and diastolic blood pressure, antihypertensive use, low and high density lipoprotein levels, waist hip ratio, and reported ethanol use.

Model 3 adjusted for variables in model 1 and brain parenchymal fraction, subclinical infarct status, and log white matter hyperintensity volume.

**Supplemental Table 3. Sensitivity analysis examining race/ethnic associations with outcomes of MCI/dementia versus cognitively healthy, and dementia versus MCI/cognitively healthy**

|                       | MCI/Dementia combined versus Healthy |              |         |         | Dementia versus MCI/Healthy combined |              |       |        |
|-----------------------|--------------------------------------|--------------|---------|---------|--------------------------------------|--------------|-------|--------|
|                       | OR                                   | 95% CI of OR | p*      | p**     | OR                                   | 95% CI of OR | p*    | p**    |
| Model 1               |                                      |              |         | <0.0001 |                                      |              |       | 0.0208 |
| Black versus White    | 2.0                                  | 1.0 3.8      | 0.043   |         | 1.7                                  | 0.3 9.4      | 0.516 |        |
| Hispanic versus white | 4.4                                  | 2.2 8.8      | <0.0001 |         | 7.3                                  | 1.3 40.7     | 0.022 |        |
| Hispanic versus Black | 2.2                                  | 1.3 3.9      | 0.004   |         | 4.2                                  | 1.2 15.1     | 0.028 |        |
| Model 2               |                                      |              |         | <0.0001 |                                      |              |       | 0.0624 |
| Black versus White    | 1.8                                  | 0.9 3.7      | 0.087   |         | 2.0                                  | 0.3 11.3     | 0.456 |        |
| Hispanic versus white | 4.5                                  | 2.1 9.3      | <0.0001 |         | 6.6                                  | 1.1 39.8     | 0.039 |        |
| Hispanic versus Black | 2.4                                  | 1.3 4.4      | 0.003   |         | 3.4                                  | 0.8 13.8     | 0.089 |        |
| Model 3               |                                      |              |         | <0.0001 |                                      |              |       | 0.0304 |
| Black versus White    | 1.8                                  | 0.9 3.5      | 0.084   |         | 1.4                                  | 0.2 7.7      | 0.718 |        |
| Hispanic versus white | 4.3                                  | 2.1 8.7      | <0.0001 |         | 5.9                                  | 1.1 32.8     | 0.041 |        |
| Hispanic versus Black | 2.4                                  | 1.4 4.2      | 0.003   |         | 4.3                                  | 1.2 15.8     | 0.027 |        |

\* p-value for testing pairwise comparison based on logistic regression

\*\* p-value for Likelihood Ratio Test with 2 degrees of freedom

Model 1 adjusted for age, education, medical insurance status, literacy.

Model 2 adjusted for variables in model 1 and smoking, leisure time physical activity, diabetes mellitus, systolic and diastolic blood pressure, antihypertensive use, low and high density lipoprotein levels, waist hip ratio, and reported ethanol use.

Model 3 adjusted for variables in model 1 and brain parenchymal fraction, subclinical infarct status, and log white matter hyperintensity volume.
